# Supplementary material for: Extra Virgin Olive Oil Reduces Gut Permeability and Metabolic Endotoxemia in Diabetic Patients
Source: MDPI journal article supplement (doi:10.3390/nu14102153), 2022-05-21
Supplement: s1 [file s1]

**Supplementary Table S1.** Vitamin E and total polyphenols content in EVOO.

| Compound                          | EVOO  |
|-----------------------------------|-------|
| Vitamin E (mg/Kg)                 | 75    |
| Total polyphenols (mg/L GAE)      | 435   |
| Saturated Fatty Acid (% m/m)      | 18.67 |
| Mono-saturated Fatty Acid (% m/m) | 66.6  |
| Poli-saturated Fatty Acid (% m/m) | 13.6  |
| Peroxide (meq O2/kg)              | <10   |
| Oleuropein (mg/Kg)                | 4.0   |
| Acidity (%)                       | 0.34  |
| Hydroxytyrosol (mg/g)             | 2.54  |
| Tyrosol (mg/g)                    | 7.89  |

**Supplementary Table S2.** Meal composition.

|                       | Proteins (g) | Lipids (g) | Carbohydrates (g) | Total fiber (g) |
|-----------------------|--------------|------------|-------------------|-----------------|
| Pasta (100g)          | 10.8         | 0.3        | 82.8              | 0               |
| Chicken breast (150g) | 35.4         | 2.1        | 0                 | 0               |
| Salad (80g)           | 1.44         | 0.32       | 1.76              | 1.5             |
| Bread (80g)           | 6.56         | 0.4        | 54                | 0               |
| Apple (200g)          | 0.4          | 0,6        | 22                | 3               |
| Total g.              | 54.6         | 3.72       | 160.56            | 4.5             |
| Kcal                  | 218.4        | 33.48      | 642.24            | 9               |
